# Supplementary material for: The Safety of mRNA-1273, BNT162b2 and JNJ-78436735 COVID-19 Vaccines: Safety Monitoring for Adverse Events Using Real-World Data
Source: MDPI journal article supplement (doi:10.3390/vaccines10020320), 2022-02-17
Supplement: s1 [file s1]

**Supplementary Materials:**

**The Safety of mRNA-1273, BNT162b2, and JNJ-78436735 COVID-19  
Vaccines: Safety Monitoring for Adverse Events Using Real-World Data**

**Soonok Sa, Chae Won Lee, Sung Ryul Shim, Hyounggyoon Yoo, Jinwha Choi, Ju Hee Kim,  
Kiwon Lee, Myunghee Hong\* and Hyun Wook Han\***

This supplementary material contains **additional one figure**, and **six tables**.

**Table S1.** Characteristics of individuals who report at least one adverse event after COVID-19 vaccination

|                | mRNA-<br>1273     | BNT162b2          | JNJ-<br>78436735  | Sum               |
|----------------|-------------------|-------------------|-------------------|-------------------|
| <b>Females</b> |                   |                   |                   |                   |
| 18-24          | 8,153             | 9,291             | 2,312             | 19,756            |
| 25-39          | 39,654            | 39,934            | 6,990             | 86,578            |
| 40-49          | 29,968            | 29,643            | 4,929             | 64,540            |
| 50-64          | 47,049            | 40,449            | 7,373             | 94,871            |
| 65-74          | 32,345            | 17,672            | 1,927             | 51,944            |
| ≥75            | 18,534            | 9,978             | 791               | 29,303            |
| <b>Sum</b>     | 175,703           | 146,967           | 24,322            | 346,992           |
| <b>Males</b>   |                   |                   |                   |                   |
| 18-24          | 3,717             | 4,820             | 2,017             | 10,554            |
| 25-39          | 11,992            | 14,364            | 4,303             | 30,659            |
| 40-49          | 8,303             | 9,437             | 2,372             | 20,112            |
| 50-64          | 15,838            | 15,117            | 3,934             | 34,889            |
| 65-74          | 12,634            | 8,816             | 1,111             | 22,561            |
| ≥75            | 8,971             | 5,915             | 519               | 15,405            |
| <b>Sum</b>     | 61,455            | 58,469            | 14,256            | 134,180           |
| <b>SUM of</b>  | <b>237,158</b>    | <b>205,436</b>    | <b>38,578</b>     | <b>481,172</b>    |
| <b>VAERES</b>  | <b>(0.15656%)</b> | <b>(0.09211%)</b> | <b>(0.25718%)</b> | <b>(0.12353%)</b> |

**Table S2.** Classification of severe AEs

| Severe AEs                                           | Groups                     |
|------------------------------------------------------|----------------------------|
| Bell's palsy                                         | central nervous disorders  |
| stroke, ischemia                                     |                            |
| stroke, hemorrhagic                                  |                            |
| encephalitis/myelitis/encephalomyelitis              |                            |
| cerebral venous sinus thrombosis                     |                            |
| convulsion/seizures                                  |                            |
| Guillain–Barré syndrome                              |                            |
| transverse myelitis                                  |                            |
| acute disseminated encephalomyelitis                 |                            |
| narcolepsy/cataplexy                                 | respiratory disorders      |
| pulmonary embolism                                   |                            |
| acute respiratory distress syndrome (ARDS)           | cardiac disorders          |
| acute myocardial infarction                          |                            |
| myocarditis/pericarditis                             |                            |
| appendicitis                                         | gastrointestinal disorders |
| anemia                                               |                            |
| lymphadenopathy                                      | hematologic disorders      |
| lymphopenia                                          |                            |
| neutropenia                                          |                            |
| other thrombosis                                     |                            |
| thrombocytopenia                                     |                            |
| deep vein thrombosis                                 | others                     |
| anaphylaxis                                          |                            |
| multisystem inflammatory syndrome in children/adults |                            |
| death                                                |                            |

**Table S3.** Diagnostic codes used to identify AEs and onset date.

| <b>Severe AEs<br/>for Comparative Analyses</b>          | <b>MedDRA code(s), ver. 24.0</b>                                                                                                                                                                                                                                                                                                                                            |
|---------------------------------------------------------|-----------------------------------------------------------------------------------------------------------------------------------------------------------------------------------------------------------------------------------------------------------------------------------------------------------------------------------------------------------------------------|
| Bell's palsy                                            | 10004223, 10030069                                                                                                                                                                                                                                                                                                                                                          |
| Stroke, hemorrhagic                                     | 10042316, 10073564, 10019016, 10055677                                                                                                                                                                                                                                                                                                                                      |
| Stroke, ischemic                                        | 10044390, 10060840, 10061256, 10043647                                                                                                                                                                                                                                                                                                                                      |
| Encephalitis / myelitis /<br>encephalomyelitis          | 10014581, 10014589, 10014619, 10058994, 10076948, 10082097,<br>10074713, 10048999                                                                                                                                                                                                                                                                                           |
| Cerebral venous sinus<br>thrombosis                     | 10083037                                                                                                                                                                                                                                                                                                                                                                    |
| Convulsions / seizures                                  | 10003628, 10056699, 10049612, 10053398, 10010145, 10052391,<br>10010904, 10010920, 10015037, 10077380, 10016284, 10018090,<br>10083376, 10018100, 10018659, 10071081, 10054859, 10056209,<br>10061334, 10034759, 10039906, 10039907, 10071350, 10040703,<br>10041962, 10043209, 10051171, 10043994                                                                          |
| Guillain-Barré syndrome                                 | 10018767, 10049567, 10061811                                                                                                                                                                                                                                                                                                                                                |
| Transverse myelitis                                     | 10028527                                                                                                                                                                                                                                                                                                                                                                    |
| Acute disseminated<br>encephalomyelitis                 | 10000709                                                                                                                                                                                                                                                                                                                                                                    |
| Narcolepsy / cataplexy                                  | 10007737, 10028713                                                                                                                                                                                                                                                                                                                                                          |
| Pulmonary embolism                                      | 10037377, 10063909, 10069909, 10083093                                                                                                                                                                                                                                                                                                                                      |
| Acute respiratory distress<br>syndrome                  | 10001052                                                                                                                                                                                                                                                                                                                                                                    |
| Acute myocardial infarction                             | 10000891                                                                                                                                                                                                                                                                                                                                                                    |
| Myocarditis / pericarditis                              | 10064539, 10079058, 10014961, 10081004, 10082606, 10028606,<br>10034484, 10034486, 10034487, 10059361, 10051071                                                                                                                                                                                                                                                             |
| Appendicitis                                            | 10003011, 10063063, 10003012, 10081534                                                                                                                                                                                                                                                                                                                                      |
| Anemia                                                  | 10022972, 10061101, 10002080, 10002081, 10037006, 10018916,<br>10002967                                                                                                                                                                                                                                                                                                     |
| Lymphadenopathy                                         | 10025197                                                                                                                                                                                                                                                                                                                                                                    |
| Lymphopenia                                             | 10025327                                                                                                                                                                                                                                                                                                                                                                    |
| Neutropenia                                             | 10029354, 10059482                                                                                                                                                                                                                                                                                                                                                          |
| Other thrombosis                                        | 10014513, 10014522, 10048632, 10036206, 10006537, 10003880,<br>10047249, 10002910, 10003192, 10007688, 10007830, 10008023,<br>10008092, 10008132, 10008138, 10019713, 10023237, 10027397,<br>10027402, 10034272, 10034324, 10036300, 10037340, 10037437,<br>10037459, 10038548, 10038908, 10041659, 10049446, 10082030,<br>10074349, 10072059, 10038547, 10078810, 10081850 |
| Thrombocytopenia                                        | 10043554, 10058423, 10076744, 10076747, 10078387, 10083842                                                                                                                                                                                                                                                                                                                  |
| Deep vein thrombosis                                    | 10051055, 10043570, 10043581, 10043595                                                                                                                                                                                                                                                                                                                                      |
| Anaphylaxis                                             | 10002198, 10002199, 10002216, 10063119                                                                                                                                                                                                                                                                                                                                      |
| Multisystem inflammatory<br>syndrome in children/adults | 10084767, 10051379                                                                                                                                                                                                                                                                                                                                                          |
| Death                                                   | 10011906                                                                                                                                                                                                                                                                                                                                                                    |

**Table S4.** Characteristics of serious outcomes for the three vaccines

|                           | mRNA-1273                  | BNT162b2                   | JNJ-78436735             |
|---------------------------|----------------------------|----------------------------|--------------------------|
| Hospital Days<br>(median) | 7,997 (3)                  | 9,246 (3)                  | 2,306 (3)                |
| Disable (%)               | 2,803 (0.00185%)           | 3,696 (0.001635%)          | 851 (0.005673%)          |
| ER visit (%)              | 20 (0%)                    | 27 (0%)                    | 1 (0%)                   |
| Died (%)                  | 2,718 (0.001794%)          | 2,428 (0.001074%)          | 546 (0.0036399%)         |
| <b>Total</b>              | <b>13,538 (0.0089371%)</b> | <b>15,397 (0.0068118%)</b> | <b>3,704 (0.024693%)</b> |

**Table S5.** Multivariate regression analysis for major AEs by sex (coding male as 1 and female as 0), age (years), onset days (number of days), and vaccine type (coding mRNA vaccines as 0 and viral vector vaccine as 1) as covariates. Dependent variables: incidence, independent variables: sex (coding male as 1 and female as 0), age (years), onset days (number of days), and vaccine type.

|                | Death                    |               |          | Anaphylaxis                 |               |          | Overall severe AEs                  |               |          |
|----------------|--------------------------|---------------|----------|-----------------------------|---------------|----------|-------------------------------------|---------------|----------|
|                | OR                       | CI            | <i>p</i> | OR                          | CI            | <i>p</i> | OR                                  | CI            | <i>p</i> |
| Sex (M/F)      | 2.761                    | 2.599 – 2.933 | < 0.001  | 0.532                       | 0.465 – 0.608 | < 0.001  | 1.374                               | 1.342 – 1.406 | < 0.001  |
| Age (years)    | 1.086                    | 1.084 – 1.089 | < 0.001  | 0.989                       | 0.986 – 0.992 | < 0.001  | 1.001                               | 1.001 – 1.002 | < 0.001  |
| Onset (days)   | 1.007                    | 1.007 – 1.008 | < 0.001  | 0.959                       | 0.949 – 0.969 | < 0.001  | 1.005                               | 1.005 – 1.006 | < 0.001  |
| Vaccine types* | 1.901                    | 1.713 – 2.111 | < 0.001  | 0.619                       | 0.495 – 0.772 | < 0.001  | 1.044                               | 1.005 – 1.086 | 0.028    |
|                | Bell's palsy             |               |          | Guillain–Barré syndrome     |               |          | Cerebral venous sinus thrombosis    |               |          |
|                | OR                       | CI            | <i>p</i> | OR                          | CI            | <i>p</i> | OR                                  | CI            | <i>p</i> |
| Sex (M/F)      | 2.042                    | 1.885 – 2.213 | < 0.001  | 2.310                       | 1.931 – 2.764 | < 0.001  | 0.942                               | 0.648 – 1.369 | 0.755    |
| Age (years)    | 1.003                    | 1.000 – 1.005 | 0.025    | 1.015                       | 1.010 – 1.020 | < 0.001  | 0.991                               | 0.981 – 1.001 | 0.072    |
| Onset (days)   | 1.008                    | 1.007 – 1.009 | < 0.001  | 1.008                       | 1.006 – 1.010 | < 0.001  | 1.013                               | 1.009 – 1.016 | < 0.001  |
| Vaccine types* | 0.923                    | 0.798 – 1.067 | 0.279    | 4.183                       | 3.411 – 5.130 | < 0.001  | 5.049                               | 3.492 – 7.301 | < 0.001  |
|                | Myocarditis/Pericarditis |               |          | Acute myocardial infarction |               |          | Acute respiratory distress syndrome |               |          |
|                | OR                       | CI            | <i>p</i> | OR                          | CI            | <i>p</i> | OR                                  | CI            | <i>p</i> |
| Sex (M/F)      | 5.614                    | 5.074 – 6.211 | < 0.001  | 3.593                       | 2.994 – 4.312 | < 0.001  | 2.167                               | 1.430 – 3.283 | < 0.001  |
| Age (years)    | 0.955                    | 0.952 – 0.958 | < 0.001  | 1.037                       | 1.032 – 1.043 | < 0.001  | 1.050                               | 1.036 – 1.064 | < 0.001  |
| Onset (days)   | 1.009                    | 1.008 – 1.011 | < 0.001  | 1.007                       | 1.005 – 1.009 | < 0.001  | 1.015                               | 1.012 – 1.018 | < 0.001  |
| Vaccine types* | 0.378                    | 0.305 – 0.469 | < 0.001  | 1.130                       | 0.818 – 1.562 | 0.458    | 2.951                               | 1.706 – 5.105 | < 0.001  |
|                | Pulmonary embolism       |               |          | Thrombocytopenia            |               |          | Deep vein thrombosis                |               |          |
|                | OR                       | CI            | <i>p</i> | OR                          | CI            | <i>p</i> | OR                                  | CI            | <i>p</i> |
| Sex (M/F)      | 2.002                    | 1.832 – 2.188 | < 0.001  | 1.827                       | 1.550 – 2.154 | < 0.001  | 2.103                               | 1.910 – 2.315 | < 0.001  |
| Age (years)    | 1.023                    | 1.020 – 1.025 | < 0.001  | 1.022                       | 1.017 – 1.027 | < 0.001  | 1.022                               | 1.019 – 1.025 | < 0.001  |
| Onset (days)   | 1.009                    | 1.008 – 1.010 | < 0.001  | 1.009                       | 1.007 – 1.011 | < 0.001  | 1.008                               | 1.007 – 1.009 | < 0.001  |
| Vaccine types* | 3.108                    | 2.782 – 3.472 | < 0.001  | 2.421                       | 1.943 – 3.016 | < 0.001  | 4.015                               | 3.588 – 4.493 | < 0.001  |
|                | Lymphadenopathy          |               |          | Overall common AEs          |               |          | COVID - 19                          |               |          |
|                | OR                       | CI            | <i>p</i> | OR                          | CI            | <i>p</i> | OR                                  | CI            | <i>p</i> |
| Sex (M/F)      | 0.524                    | 0.501 – 0.548 | < 0.001  | 0.621                       | 0.612 – 0.630 | < 0.001  | 1.527                               | 1.463 – 1.593 | < 0.001  |
| Age (years)    | 0.984                    | 0.983 – 0.985 | < 0.001  | 0.999                       | 0.999 – 0.999 | < 0.001  | 1.010                               | 1.009 – 1.012 | < 0.001  |
| Onset (days)   | 0.993                    | 0.992 – 0.994 | < 0.001  | 1.000                       | 1.000 – 1.001 | 0.030    | 1.031                               | 1.031 – 1.031 | < 0.001  |
| Vaccine types* | 0.314                    | 0.284 – 0.346 | < 0.001  | 1.314                       | 1.280 – 1.350 | < 0.001  | 1.396                               | 1.307 – 1.490 | < 0.001  |

\*Two mRNA vaccines/one viral vector vaccine

OR: Odds Ratio, CI: 95% confidence intervals, *p*: *p*-values

**Table S6.** Multivariate regression analysis for major AEs by sex (coding male as 1 and female as 0), age (years), onset of symptoms (number of days), and vaccine types (reference: BNT162b2) as covariates. Dependent variables: incidence, independent variables: sex (coding male as 1 and female as 0), age (years), onset of symptoms (days), and vaccine type.

|                                    | Death<br>(N =<br>4,589)        | AP<br>(N =<br>1,610)           | Overall<br>severe<br>AEs<br>(N =<br>36,077) | BP<br>(N =<br>2,505)           | GBS<br>(N = 510)               | CVST<br>(N = 133)              | MP<br>(N =<br>1,766)           | AMI<br>(N = 494)               | ARDS<br>(N = 92)               | PE<br>(N =<br>2,046)           | TB<br>(N = 599)                | DVT<br>(N=1,733<br>)           | LP<br>(N =<br>15,018)          | Overall<br>common<br>AEs<br>(N =<br>369,788) | COVID-19<br>(N=13,509<br>)     | DRD <sup>†</sup><br>(N=6,183<br>) |
|------------------------------------|--------------------------------|--------------------------------|---------------------------------------------|--------------------------------|--------------------------------|--------------------------------|--------------------------------|--------------------------------|--------------------------------|--------------------------------|--------------------------------|--------------------------------|--------------------------------|----------------------------------------------|--------------------------------|-----------------------------------|
| Sex (M/F)                          | 2.748***<br>(2.586 –<br>2.919) | 0.525***<br>(0.460 –<br>0.600) | 1.363***<br>(1.332 –<br>1.395)              | 2.028***<br>(1.871 –<br>2.197) | 2.290***<br>(1.914 –<br>2.741) | 0.941<br>(0.647 –<br>1.367)    | 5.575***<br>(5.039 –<br>6.169) | 3.552***<br>(2.960 –<br>4.264) | 2.161***<br>(1.426 –<br>3.274) | 1.995***<br>(1.826 –<br>2.180) | 1.812***<br>(1.537 –<br>2.137) | 2.088***<br>(1.897 –<br>2.300) | 0.519***<br>(0.497 –<br>0.543) | 0.627***<br>(0.618 –<br>0.636)               | 1.502***<br>(1.439 –<br>1.568) | –                                 |
| Age (years)                        | 1.087***<br>(1.084 –<br>1.089) | 0.990***<br>(0.987 –<br>0.993) | 1.002***<br>(1.001 –<br>1.003)              | 1.003***<br>(1.001 –<br>1.006) | 1.016***<br>(1.011 –<br>1.021) | 0.991<br>(0.981 –<br>1.001)    | 0.956***<br>(0.953 –<br>0.959) | 1.038***<br>(1.033 –<br>1.044) | 1.050***<br>(1.036 –<br>1.064) | 1.023***<br>(1.020 –<br>1.026) | 1.812***<br>(1.537 –<br>2.137) | 1.022***<br>(1.020 –<br>1.025) | 0.985***<br>(0.984 –<br>0.986) | 0.998***<br>(0.997 –<br>0.998)               | 1.012***<br>(1.011 –<br>1.013) | 0.949***<br>(0.947 –<br>0.951)    |
| Onset (days)                       | 1.007***<br>(1.006 –<br>1.008) | 0.962***<br>(0.952 –<br>0.971) | 1.002***<br>(1.001 –<br>1.003)              | 1.008***<br>(1.007 –<br>1.009) | 1.008***<br>(1.006 –<br>1.010) | 1.012***<br>(1.009 –<br>1.016) | 1.009***<br>(1.008 –<br>1.010) | 1.007***<br>(1.005 –<br>1.009) | 1.015***<br>(1.012 –<br>1.018) | 1.009***<br>(1.008 –<br>1.010) | 1.009***<br>(1.007 –<br>1.010) | 1.007***<br>(1.006 –<br>1.009) | 0.993***<br>(0.992 –<br>0.994) | 1.001***<br>(1.000 –<br>1.001)               | 1.031***<br>(1.03 –<br>1.031)  | 1.008***<br>(1.007 –<br>1.009)    |
| Vaccine type<br>(JNJ-<br>78436735) | 1.739***<br>(1.559 –<br>1.941) | 0.513***<br>(0.409 –<br>0.643) | 0.928***<br>(0.891 –<br>0.966)              | 0.833*<br>(0.717 –<br>0.968)   | 3.565***<br>(2.852 –<br>4.457) | 4.829***<br>(3.175 –<br>7.343) | 0.346***<br>(0.278 –<br>0.431) | 0.964<br>(0.691 –<br>1.346)    | 2.767***<br>(1.532 –<br>4.997) | 2.916***<br>(2.584 –<br>3.290) | 2.112***<br>(1.671 –<br>2.669) | 3.536***<br>(3.126 –<br>4.001) | 0.280***<br>(0.254 –<br>0.310) | 1.550***<br>(1.508 –<br>1.593)               | 1.083*<br>(1.012 –<br>1.158)   | 0.992<br>(0.909 –<br>1.083)       |
| Vaccine type<br>(mRNA-<br>1273)    | 0.848***<br>(0.796 –<br>0.904) | 0.663***<br>(0.597 –<br>0.735) | 0.784***<br>(0.766 –<br>0.802)              | 0.806***<br>(0.742 –<br>0.877) | 0.714**<br>(0.578 –<br>0.882)  | 0.913<br>(0.601 –<br>1.386)    | 0.816***<br>(0.739 –<br>0.901) | 0.720***<br>(0.598 –<br>0.868) | 0.879<br>(0.557 –<br>1.388)    | 0.881*<br>(0.797 –<br>0.973)   | 0.755**<br>(0.630 –<br>0.903)  | 0.772***<br>(0.690 –<br>0.863) | 0.792***<br>(0.765 –<br>0.819) | 1.400***<br>(1.380 –<br>1.421)               | 0.566***<br>(0.542 –<br>0.592) | 0.593***<br>(0.561 –<br>0.628)    |

The odds ratio was calculated by multivariate logistic regression analysis for each severe AEs after adjusting for sex (reference: female), age, onset days of symptoms (number of days), and vaccine type (reference: BNT162b2) as covariates. AMI, Acute myocardial infarction; AP, Anaphylaxis; ARDS, Acute respiratory distress syndrome; BP, Bell's palsy; CVST, cerebral venous sinus thrombosis; DRD, Dysmenorrhea and related disorders (Dysmenorrhea or disruption of menstrual cycles); DVT, deep vein thrombosis; GBS, Guillain-Barré syndrome; LP, lymphadenopathy; MP, Myocarditis/Pericarditis; PE, pulmonary embolism; TB, thrombocytopenia.

\* $p < 0.05$ , \*\* $p < 0.01$ , \*\*\* $p < 0.001$ .

<sup>†</sup>This analysis was conducted only on women.

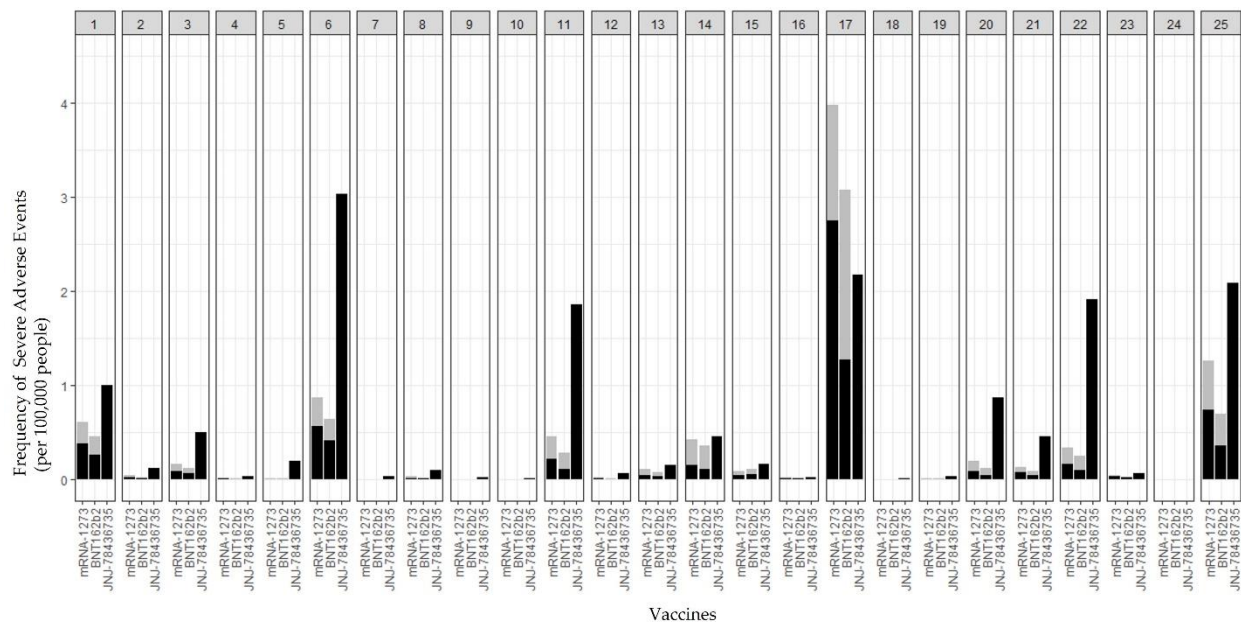

(a)

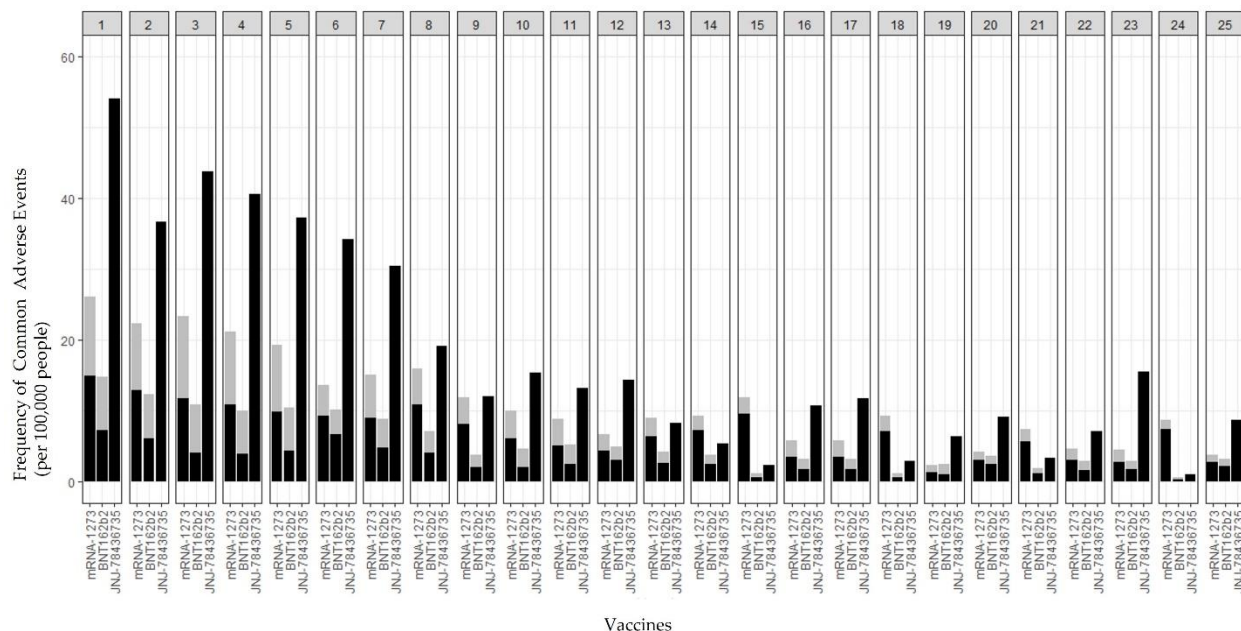

(b)



**Figure S1.** Incidence (per 100,000 people) of specific AEs among recipients of either of the two mRNA vaccines (mRNA-1273, and BNT162b2) or the one viral vector vaccine (JNJ-78436735). Comparative incidence per 100,000 people of each 25 AEs among the three types of vaccines : (a) Incidence of severe AEs of the 25 groups after vaccination (1: Bell's palsy; 2: Stroke, hemorrhagic; 3: Stroke, ischemic; 4: Encephalitis/myelitis/encephalomyelitis; 5: Cerebral venous sinus thrombosis; 6: Convulsions/seizures; 7: Guillain-Barré syndrome; 8: Transverse myelitis; 9: Acute disseminated encephalomyelitis; 10: Narcolepsy/cataplexy; 11: Pulmonary embolism; 12: Acute respiratory distress syndrome; 13: Acute myocardial infarction; 14: Myocarditis/pericarditis; 15: Appendicitis; 16: Anemia; 17: Lymphadenopathy; 18: Lymphopenia; 19: Neutropenia; 20: Other thrombosis; 21: Thrombocytopenia; 22: Deep vein thrombosis; 23: Anaphylaxis; 24: Multisystem inflammatory syndrome in children/adults, 25: Death); (b) Incidence of the 25 common AEs after vaccination (1: Headache, 2: Fatigue, 3: Pyrexia, 4: Chills, 5: Pain, 6: Dizziness, 7: Nausea, 8: Pain in extremity, 9: Injection site pain, 10: Myalgia, 11: Arthralgia, 12: Dyspnoea, 13: Rash, 14: Pruritus, 15: Injection site erythema, 16: Asthenia, 17: Vomiting, 18: Injection site swelling, 19: COVID-19, 20: Paraesthesia, 21: Erythema, 22: Diarrhoea, 23: Hyperhidrosis, 24: Injection site pruritus, 25: Hypoesthesia) ; (b) Incidence of severe AEs of the 25 groups after vaccination (The ranked top-25 common AEs were listed in order of incidence) , dose 1( the first dose): black , dose 2 (the second dose): grey.

+ This graph consists of data in which doses are recorded as 1 or 2.
